# Supplementary material
Source: HighWire-hosted journal article supplement (https://srh.bmj.com/content/bmjsrh-2020-200799)
Supplement: inline-supplementary-material-1 [file inline-supplementary-material-1.pdf]

**Supplementary File 1. Positionality statement**

The authorship team consists of individuals with an academic, clinical and/or third sector background, all of whom have experience conducting research or providing healthcare to people experiencing homelessness. The first author (MP) who was also involved in the analysis of data is a researcher whose work mainly focuses on improving access to healthcare for vulnerable groups. In the last four years, she has also been actively involved as a volunteer with two services providing support to people experiencing homelessness, and those working on the streets (also known as 'sex workers'). Through this work, the researcher has become acutely aware of the impact of homelessness on people's health and the difficulties they encounter in accessing mainstream healthcare services. She recognises the importance of patient-centred care and values an approach where the individual's living situation, needs and wishes are taken into consideration when providing care.
