# Supplementary material
Source: HighWire-hosted journal article supplement (https://srh.bmj.com/content/bmjsrh-2020-200799)
Supplement: inline-supplementary-material-2 [file inline-supplementary-material-2.pdf]

## Supplementary File 2. Search histories

| Database                     | Search results<br>17/05/2018 | Search results<br>22/04/2020 | Total results |
|------------------------------|------------------------------|------------------------------|---------------|
| Embase                       | 910                          | 167                          | 1077          |
| Medline                      | 1782                         | 199                          | 1981          |
| Cinahl                       | 233                          | 40                           | 273           |
| SocINDEX                     | 67                           | 5                            | 72            |
| Total results                | 2992                         | 411                          | 3403          |
| Total after<br>deduplication | 2213                         | 300                          | 2513          |

Embase &lt;1974 to 2020 April 21&gt;

Search history sorted by search number ascending

| #  | Searches                                            | Results | Type     |
|----|-----------------------------------------------------|---------|----------|
| 1  | exp homeless person/                                | 1898    | Advanced |
| 2  | homelessness/                                       | 10933   | Advanced |
| 3  | homeless*.ab,kw,ti.                                 | 12717   | Advanced |
| 4  | (rough adj3 sleep*).ab,kw,ti.                       | 86      | Advanced |
| 5  | (street adj1 (person or people or youth)).ab,kw,ti. | 355     | Advanced |
| 6  | halfway house/                                      | 979     | Advanced |
| 7  | hostel*.ab,kw,ti.                                   | 1105    | Advanced |
| 8  | night shelter*.ab,kw,ti.                            | 44      | Advanced |
| 9  | winter shelter*.ab,kw,ti.                           | 9       | Advanced |
| 10 | (seek* adj1 shelter).ab,kw,ti.                      | 144     | Advanced |
| 11 | emergency accommodation.ab,kw,ti.                   | 22      | Advanced |
| 12 | temporary accommodation.ab,kw,ti.                   | 62      | Advanced |
| 13 | supported accommodation.ab,kw,ti.                   | 170     | Advanced |
| 14 | supported housing.ab,kw,ti.                         | 379     | Advanced |
| 15 | (vulnerabl* adj1 hous*).ab,kw,ti.                   | 212     | Advanced |
| 16 | (precarious* adj1 hous*).ab,kw,ti.                  | 78      | Advanced |
| 17 | unstable housing.ab,kw,ti.                          | 475     | Advanced |
| 18 | underhous*.ab,kw,ti.                                | 10      | Advanced |
| 19 | roofless.ab,kw,ti.                                  | 13      | Advanced |
| 20 | no fixed abode.ab,kw,ti.                            | 58      | Advanced |
| 21 | no fixed address.ab,kw,ti.                          | 32      | Advanced |
| 22 | supported lodging.ab,kw,ti.                         | 1       | Advanced |
| 23 | sofa surf*.ab,kw,ti.                                | 5       | Advanced |
| 24 | (bed adj2 breakfast).ab,kw,ti.                      | 34      | Advanced |
| 25 | (liv* adj3 squat*).ab,kw,ti.                        | 49      | Advanced |
| 26 | squatter*.ab,kw,ti.                                 | 329     | Advanced |

|    |                                                                                                                                                                   |        |          |
|----|-------------------------------------------------------------------------------------------------------------------------------------------------------------------|--------|----------|
| 27 | runaway*.ab,kw,ti.                                                                                                                                                | 1667   | Advanced |
| 28 | (risk adj3 evict*).ab,kw,ti.                                                                                                                                      | 23     | Advanced |
| 29 | soup kitchen*.ab,kw,ti.                                                                                                                                           | 106    | Advanced |
|    | 1 or 2 or 3 or 4 or 5 or 6 or 7 or 8 or 9 or 10 or 11 or 12 or 13 or 14 or 15 or 16 or 17 or 18 or 19 or 20 or 21 or 22 or 23 or 24 or 25 or 26 or 27 or 28 or 29 |        |          |
| 30 |                                                                                                                                                                   | 20412  | Advanced |
| 31 | sexual health/                                                                                                                                                    | 15800  | Advanced |
| 32 | reproductive health/                                                                                                                                              | 16918  | Advanced |
| 33 | family planning/                                                                                                                                                  | 34511  | Advanced |
| 34 | exp contraception/                                                                                                                                                | 152688 | Advanced |
| 35 | condom/                                                                                                                                                           | 19744  | Advanced |
| 36 | exp sexually transmitted disease/                                                                                                                                 | 87613  | Advanced |
| 37 | sexual health*.ab,kw,ti.                                                                                                                                          | 15866  | Advanced |
| 38 | reproductive health*.ab,kw,ti.                                                                                                                                    | 19989  | Advanced |
| 39 | (contraception or contraceptive).ab,kw,ti.                                                                                                                        | 64907  | Advanced |
| 40 | family planning.ab,kw,ti.                                                                                                                                         | 18753  | Advanced |
| 41 | "condom*".ab,kw,ti.                                                                                                                                               | 24457  | Advanced |
| 42 | safe sex.ab,kw,ti.                                                                                                                                                | 1599   | Advanced |
| 43 | "sexually transmitted disease*".ab,kw,ti.                                                                                                                         | 19424  | Advanced |
| 44 | "sexually transmitted infection*".ab,kw,ti.                                                                                                                       | 18448  | Advanced |
| 45 | unintended pregnanc*.ab,kw,ti.                                                                                                                                    | 4865   | Advanced |
| 46 | abortion*.ab,kw,ti.                                                                                                                                               | 64072  | Advanced |
| 47 | (HIV adj3 screening).ab,kw,ti.                                                                                                                                    | 5982   | Advanced |
| 48 | Human immunodeficiency virus/ and Screening/<br>31 or 32 or 33 or 34 or 35 or 36 or 37 or 38 or 39 or 40 or 41 or 42 or 43 or 44 or 45 or 46 or 47 or 48          | 5364   | Advanced |
| 49 |                                                                                                                                                                   | 393217 | Advanced |
| 50 | 30 and 49                                                                                                                                                         | 1078   | Advanced |
| 51 | limit 50 to yr="2018 -Current"                                                                                                                                    | 167    | Advanced |

Ovid MEDLINE(R) and Epub Ahead of Print, In-Process & Other Non-Indexed Citations, Daily and Versions(R) <1946 to April 21, 2020>

Search history sorted by search number ascending

| #  | Searches                                            | Results | Type     |
|----|-----------------------------------------------------|---------|----------|
| 1  | exp homeless person/                                | 8743    | Advanced |
| 2  | homelessness/                                       | 7567    | Advanced |
| 3  | homeless*.ab,kf,ti.                                 | 10464   | Advanced |
| 4  | (rough adj3 sleep*).ab,kf,ti.                       | 64      | Advanced |
| 5  | (street adj1 (person or people or youth)).ab,kf,ti. | 289     | Advanced |
| 6  | halfway house/                                      | 1057    | Advanced |
| 7  | hostel*.ab,kf,ti.                                   | 819     | Advanced |
| 8  | night shelter*.ab,kf,ti.                            | 37      | Advanced |
| 9  | winter shelter*.ab,kf,ti.                           | 5       | Advanced |
| 10 | (seek* adj1 shelter).ab,kf,ti.                      | 134     | Advanced |
| 11 | emergency accommodation.ab,kf,ti.                   | 14      | Advanced |
| 12 | temporary accommodation.ab,kf,ti.                   | 50      | Advanced |
| 13 | supported accommodation.ab,kf,ti.                   | 110     | Advanced |

|    |                                                                                                                                                                   |        |          |
|----|-------------------------------------------------------------------------------------------------------------------------------------------------------------------|--------|----------|
| 14 | supported housing.ab,kf,ti.                                                                                                                                       | 312    | Advanced |
| 15 | (vulnerabl* adj1 hous*).ab,kf,ti.                                                                                                                                 | 183    | Advanced |
| 16 | (precarious* adj1 hous*).ab,kf,ti.                                                                                                                                | 67     | Advanced |
| 17 | underhous*.ab,kf,ti.                                                                                                                                              | 8      | Advanced |
| 18 | unstable housing.ab,kf,ti.                                                                                                                                        | 314    | Advanced |
| 19 | roofless.ab,kf,ti.                                                                                                                                                | 14     | Advanced |
| 20 | no fixed abode.ab,kf,ti.                                                                                                                                          | 44     | Advanced |
| 21 | no fixed address.ab,kf,ti.                                                                                                                                        | 25     | Advanced |
| 22 | (risk adj3 evict*).ab,kf,ti.                                                                                                                                      | 20     | Advanced |
| 23 | supported lodging.ab,kf,ti.                                                                                                                                       | 1      | Advanced |
| 24 | sofa surf*.ab,kf,ti.                                                                                                                                              | 2      | Advanced |
| 25 | (bed adj2 breakfast).ab,kf,ti.                                                                                                                                    | 25     | Advanced |
| 26 | (liv* adj3 squat*).ab,kf,ti.                                                                                                                                      | 46     | Advanced |
| 27 | squatter*.ab,kf,ti.                                                                                                                                               | 362    | Advanced |
| 28 | runaway*.ab,kf,ti.                                                                                                                                                | 1631   | Advanced |
| 29 | soup kitchen*.ab,kf,ti.                                                                                                                                           | 92     | Advanced |
| 30 | 1 or 2 or 3 or 4 or 5 or 6 or 7 or 8 or 9 or 10 or 11 or 12 or 13 or 14 or 15 or 16 or 17 or 18 or 19 or 20 or 21 or 22 or 23 or 24 or 25 or 26 or 27 or 28 or 29 | 17153  | Advanced |
| 31 | Sexual Health/                                                                                                                                                    | 866    | Advanced |
| 32 | Reproductive Health/                                                                                                                                              | 3224   | Advanced |
| 33 | Family Planning Services/                                                                                                                                         | 24696  | Advanced |
| 34 | Reproductive Health Services/                                                                                                                                     | 1861   | Advanced |
| 35 | exp Contraception/                                                                                                                                                | 26632  | Advanced |
| 36 | Condoms/                                                                                                                                                          | 10185  | Advanced |
| 37 | exp Sexually Transmitted Diseases/                                                                                                                                | 337972 | Advanced |
| 38 | "sexual health*".ab,kf,ti.                                                                                                                                        | 9929   | Advanced |
| 39 | "reproductive health*".ab,kf,ti.                                                                                                                                  | 14760  | Advanced |
| 40 | (contraception or contraceptive).ab,kf,ti.                                                                                                                        | 60930  | Advanced |
| 41 | family planning.ab,kf,ti.                                                                                                                                         | 40990  | Advanced |
| 42 | "condom*".ab,kf,ti.                                                                                                                                               | 21473  | Advanced |
| 43 | safe sex.ab,kf,ti.                                                                                                                                                | 1368   | Advanced |
| 44 | "sexually transmitted disease*".ab,kf,ti.                                                                                                                         | 17102  | Advanced |
| 45 | "sexually transmitted infection*".ab,kf,ti.                                                                                                                       | 13857  | Advanced |
| 46 | "unintended pregnanc*".ab,kf,ti.                                                                                                                                  | 3661   | Advanced |
| 47 | "abortion*".ab,kf,ti.                                                                                                                                             | 61858  | Advanced |
| 48 | (HIV adj3 screening).ab,kf,ti.                                                                                                                                    | 4197   | Advanced |
| 49 | HIV/ and mass screening/                                                                                                                                          | 355    | Advanced |
| 50 | 31 or 32 or 33 or 34 or 35 or 36 or 37 or 38 or 39 or 40 or 41 or 42 or 43 or 44 or 45 or 46 or 47 or 48 or 49                                                    | 496939 | Advanced |
| 51 | 30 and 50                                                                                                                                                         | 1969   | Advanced |
| 52 | limit 51 to yr="2018 -Current"                                                                                                                                    | 199    | Advanced |

Database - CINAHL Plus with Full Text; SocINDEX

Search Screen - Advanced Search

| #  | Query                | Results |
|----|----------------------|---------|
| S1 | (SU "Sexual Health") | 8,544   |

|     |                                                                                                                                                                                                                                                                                                                                                                                                                                                                                                                                                                                                                                                                                                                                                                                                                                                                                                                                                                                                                                                                                                                                                                                                                                                                                                                                                                                                                                                              |         |
|-----|--------------------------------------------------------------------------------------------------------------------------------------------------------------------------------------------------------------------------------------------------------------------------------------------------------------------------------------------------------------------------------------------------------------------------------------------------------------------------------------------------------------------------------------------------------------------------------------------------------------------------------------------------------------------------------------------------------------------------------------------------------------------------------------------------------------------------------------------------------------------------------------------------------------------------------------------------------------------------------------------------------------------------------------------------------------------------------------------------------------------------------------------------------------------------------------------------------------------------------------------------------------------------------------------------------------------------------------------------------------------------------------------------------------------------------------------------------------|---------|
| S2  | (SU "Reproductive Health")                                                                                                                                                                                                                                                                                                                                                                                                                                                                                                                                                                                                                                                                                                                                                                                                                                                                                                                                                                                                                                                                                                                                                                                                                                                                                                                                                                                                                                   | 9,005   |
| S3  | (SU "Family Planning")                                                                                                                                                                                                                                                                                                                                                                                                                                                                                                                                                                                                                                                                                                                                                                                                                                                                                                                                                                                                                                                                                                                                                                                                                                                                                                                                                                                                                                       | 8,233   |
| S4  | (SU "Contraception")                                                                                                                                                                                                                                                                                                                                                                                                                                                                                                                                                                                                                                                                                                                                                                                                                                                                                                                                                                                                                                                                                                                                                                                                                                                                                                                                                                                                                                         | 12,732  |
| S5  | (SU "Condoms")                                                                                                                                                                                                                                                                                                                                                                                                                                                                                                                                                                                                                                                                                                                                                                                                                                                                                                                                                                                                                                                                                                                                                                                                                                                                                                                                                                                                                                               | 10,179  |
| S6  | (SU "Sexually Transmitted Diseases, Bacterial+")                                                                                                                                                                                                                                                                                                                                                                                                                                                                                                                                                                                                                                                                                                                                                                                                                                                                                                                                                                                                                                                                                                                                                                                                                                                                                                                                                                                                             | 21,958  |
| S7  | TI "sexual health" OR AB "sexual health"                                                                                                                                                                                                                                                                                                                                                                                                                                                                                                                                                                                                                                                                                                                                                                                                                                                                                                                                                                                                                                                                                                                                                                                                                                                                                                                                                                                                                     | 9,525   |
| S8  | TI "sexual healthcare" OR AB "sexual healthcare"                                                                                                                                                                                                                                                                                                                                                                                                                                                                                                                                                                                                                                                                                                                                                                                                                                                                                                                                                                                                                                                                                                                                                                                                                                                                                                                                                                                                             | 102     |
| S9  | TI "reproductive health" OR AB "reproductive health"                                                                                                                                                                                                                                                                                                                                                                                                                                                                                                                                                                                                                                                                                                                                                                                                                                                                                                                                                                                                                                                                                                                                                                                                                                                                                                                                                                                                         | 9,266   |
| S10 | TI "reproductive healthcare" OR AB "reproductive healthcare"                                                                                                                                                                                                                                                                                                                                                                                                                                                                                                                                                                                                                                                                                                                                                                                                                                                                                                                                                                                                                                                                                                                                                                                                                                                                                                                                                                                                 | 332     |
| S11 | TI (contraception or contraceptive*) OR AB (contraception or contraceptive*)                                                                                                                                                                                                                                                                                                                                                                                                                                                                                                                                                                                                                                                                                                                                                                                                                                                                                                                                                                                                                                                                                                                                                                                                                                                                                                                                                                                 | 26,415  |
| S12 | TI "family planning" OR AB "family planning"                                                                                                                                                                                                                                                                                                                                                                                                                                                                                                                                                                                                                                                                                                                                                                                                                                                                                                                                                                                                                                                                                                                                                                                                                                                                                                                                                                                                                 | 10,009  |
| S13 | TI condom* OR AB condom*                                                                                                                                                                                                                                                                                                                                                                                                                                                                                                                                                                                                                                                                                                                                                                                                                                                                                                                                                                                                                                                                                                                                                                                                                                                                                                                                                                                                                                     | 15,390  |
| S14 | TI "safe sex" OR AB "safe sex"                                                                                                                                                                                                                                                                                                                                                                                                                                                                                                                                                                                                                                                                                                                                                                                                                                                                                                                                                                                                                                                                                                                                                                                                                                                                                                                                                                                                                               | 1,208   |
| S15 | TI ("sexually transmitted" N1 (disease* or infection*)) OR AB ("sexually transmitted" N1 (disease* or infection*))                                                                                                                                                                                                                                                                                                                                                                                                                                                                                                                                                                                                                                                                                                                                                                                                                                                                                                                                                                                                                                                                                                                                                                                                                                                                                                                                           | 15,885  |
| S16 | TI (unintended N1 pregnanc*) OR AB (unintended N1 pregnanc*)                                                                                                                                                                                                                                                                                                                                                                                                                                                                                                                                                                                                                                                                                                                                                                                                                                                                                                                                                                                                                                                                                                                                                                                                                                                                                                                                                                                                 | 3,256   |
| S17 | TI abortion* OR AB abortion*                                                                                                                                                                                                                                                                                                                                                                                                                                                                                                                                                                                                                                                                                                                                                                                                                                                                                                                                                                                                                                                                                                                                                                                                                                                                                                                                                                                                                                 | 20,586  |
| S18 | TI HIV N3 screening OR AB HIV N3 screening                                                                                                                                                                                                                                                                                                                                                                                                                                                                                                                                                                                                                                                                                                                                                                                                                                                                                                                                                                                                                                                                                                                                                                                                                                                                                                                                                                                                                   | 2,084   |
| S19 | (SU "Human Immunodeficiency Virus")                                                                                                                                                                                                                                                                                                                                                                                                                                                                                                                                                                                                                                                                                                                                                                                                                                                                                                                                                                                                                                                                                                                                                                                                                                                                                                                                                                                                                          | 5,229   |
| S20 | (SU "Health Screening")                                                                                                                                                                                                                                                                                                                                                                                                                                                                                                                                                                                                                                                                                                                                                                                                                                                                                                                                                                                                                                                                                                                                                                                                                                                                                                                                                                                                                                      | 48,745  |
| S21 | S19 AND S20                                                                                                                                                                                                                                                                                                                                                                                                                                                                                                                                                                                                                                                                                                                                                                                                                                                                                                                                                                                                                                                                                                                                                                                                                                                                                                                                                                                                                                                  | 211     |
| S22 | (S19 AND S20) OR (S1 OR S2 OR S3 OR S4 OR S5 OR S6 OR S7 OR S8 OR S9 OR S10 OR S11 OR S12 OR S13 OR S14 OR S15 OR S16 OR S17 OR S18) ( (SU "Homeless Persons") OR (SU "Homelessness") OR (SU "HOMELESS shelters")) OR TI homeless* OR TI rough N3 sleep* OR TI ( street N1 (person* or people or youth*) ) OR TI "halfway house" OR TI hostel* OR TI ( (night OR winter) N3 shelter* ) OR TI "emergency accommodation" OR TI "supported accommodation" OR TI "temporary accommodation" OR TI "supported housing" OR TI "supported lodging" OR TI vulnerabl* N1 hous* OR TI precarious* N1 hous* OR TI underhous* OR TI "unstable housing" OR TI roofless OR TI "no fixed abode" OR TI "no fixed address" OR TI risk N3 evict* OR TI sofa N3 surf* OR TI bed N3 breakfast OR TI ( (live OR living) N3 squat* ) OR TI squatter* OR TI runaway* OR TI "soup kitchen" OR AB homeless* OR AB rough N3 sleep* OR AB ( street N1 (person* or people or youth*) ) OR AB "halfway house" OR AB hostel* OR AB ( (night OR winter) N3 shelter* ) OR AB "emergency accommodation" OR AB "supported accommodation" OR AB "temporary accommodation" OR AB "supported housing" OR AB "supported lodging" OR AB vulnerabl* N1 hous* OR AB precarious* N1 hous* OR AB underhous* OR AB "unstable housing" OR AB roofless OR AB "no fixed abode" OR AB "no fixed address" OR AB risk N3 evict* OR AB sofa N3 surf* OR AB bed N3 breakfast OR AB ( (live OR living) N3 squat* ) | 101,535 |
| S23 | OR AB squatter* OR AB runaway* OR AB "soup kitchen"                                                                                                                                                                                                                                                                                                                                                                                                                                                                                                                                                                                                                                                                                                                                                                                                                                                                                                                                                                                                                                                                                                                                                                                                                                                                                                                                                                                                          | 17,541  |
| S24 | S22 AND S23                                                                                                                                                                                                                                                                                                                                                                                                                                                                                                                                                                                                                                                                                                                                                                                                                                                                                                                                                                                                                                                                                                                                                                                                                                                                                                                                                                                                                                                  | 401     |
| S25 | Limiters - Published Date: 20180101-20201231                                                                                                                                                                                                                                                                                                                                                                                                                                                                                                                                                                                                                                                                                                                                                                                                                                                                                                                                                                                                                                                                                                                                                                                                                                                                                                                                                                                                                 | 45      |
|     | Cinahl                                                                                                                                                                                                                                                                                                                                                                                                                                                                                                                                                                                                                                                                                                                                                                                                                                                                                                                                                                                                                                                                                                                                                                                                                                                                                                                                                                                                                                                       | 40      |
|     | SocINDEX                                                                                                                                                                                                                                                                                                                                                                                                                                                                                                                                                                                                                                                                                                                                                                                                                                                                                                                                                                                                                                                                                                                                                                                                                                                                                                                                                                                                                                                     | 5       |

## Searches undertaken 17/05/18

Embase &lt;1974 to 2018 May 16&gt;

Search history sorted by search number ascending

| #  | Searches                                                                                                                                                          | Results |
|----|-------------------------------------------------------------------------------------------------------------------------------------------------------------------|---------|
| 1  | exp homeless person/                                                                                                                                              | 895     |
| 2  | homelessness/                                                                                                                                                     | 9843    |
| 3  | homeless*.ab,kw,ti.                                                                                                                                               | 10599   |
| 4  | (rough adj3 sleep*).ab,kw,ti.                                                                                                                                     | 65      |
| 5  | (street adj1 (person or people or youth)).ab,kw,ti.                                                                                                               | 336     |
| 6  | halfway house/                                                                                                                                                    | 1125    |
| 7  | hostel*.ab,kw,ti.                                                                                                                                                 | 1071    |
| 8  | night shelter*.ab,kw,ti.                                                                                                                                          | 37      |
| 9  | winter shelter*.ab,kw,ti.                                                                                                                                         | 6       |
| 10 | (seek* adj1 shelter).ab,kw,ti.                                                                                                                                    | 113     |
| 11 | emergency accommodation.ab,kw,ti.                                                                                                                                 | 15      |
| 12 | temporary accommodation.ab,kw,ti.                                                                                                                                 | 53      |
| 13 | supported accommodation.ab,kw,ti.                                                                                                                                 | 123     |
| 14 | supported housing.ab,kw,ti.                                                                                                                                       | 324     |
| 15 | (vulnerabl* adj1 hous*).ab,kw,ti.                                                                                                                                 | 151     |
| 16 | (precarious* adj1 hous*).ab,kw,ti.                                                                                                                                | 61      |
| 17 | unstable housing.ab,kw,ti.                                                                                                                                        | 343     |
| 18 | underhous*.ab,kw,ti.                                                                                                                                              | 9       |
| 19 | roofless.ab,kw,ti.                                                                                                                                                | 13      |
| 20 | no fixed abode.ab,kw,ti.                                                                                                                                          | 58      |
| 21 | no fixed address.ab,kw,ti.                                                                                                                                        | 26      |
| 22 | supported lodging.ab,kw,ti.                                                                                                                                       | 1       |
| 23 | sofa surf*.ab,kw,ti.                                                                                                                                              | 4       |
| 24 | (bed adj2 breakfast).ab,kw,ti.                                                                                                                                    | 30      |
| 25 | (liv* adj3 squat*).ab,kw,ti.                                                                                                                                      | 45      |
| 26 | squatter*.ab,kw,ti.                                                                                                                                               | 322     |
| 27 | runaway*.ab,kw,ti.                                                                                                                                                | 1463    |
| 28 | (risk adj3 evict*).ab,kw,ti.                                                                                                                                      | 17      |
| 29 | soup kitchen*.ab,kw,ti.                                                                                                                                           | 99      |
| 30 | 1 or 2 or 3 or 4 or 5 or 6 or 7 or 8 or 9 or 10 or 11 or 12 or 13 or 14 or 15 or 16 or 17 or 18 or 19 or 20 or 21 or 22 or 23 or 24 or 25 or 26 or 27 or 28 or 29 | 17630   |
| 31 | sexual health/                                                                                                                                                    | 12936   |
| 32 | reproductive health/                                                                                                                                              | 14089   |
| 33 | family planning/                                                                                                                                                  | 36802   |
| 34 | exp contraception/                                                                                                                                                | 153088  |
| 35 | condom/                                                                                                                                                           | 18670   |
| 36 | exp sexually transmitted disease/                                                                                                                                 | 88571   |
| 37 | sexual health*.ab,kw,ti.                                                                                                                                          | 12790   |
| 38 | reproductive health*.ab,kw,ti.                                                                                                                                    | 16636   |
| 39 | (contraception or contraceptive).ab,kw,ti.                                                                                                                        | 61851   |
| 40 | family planning.ab,kw,ti.                                                                                                                                         | 17920   |

|    |                                                                                                                                                             |        |
|----|-------------------------------------------------------------------------------------------------------------------------------------------------------------|--------|
| 41 | "condom*".ab,kw,ti.                                                                                                                                         | 21303  |
| 42 | safe sex.ab,kw,ti.                                                                                                                                          | 1440   |
| 43 | "sexually transmitted disease*".ab,kw,ti.                                                                                                                   | 18337  |
| 44 | "sexually transmitted infection*".ab,kw,ti.                                                                                                                 | 15077  |
| 45 | unintended pregnanc*.ab,kw,ti.                                                                                                                              | 4040   |
| 46 | abortion*.ab,kw,ti.                                                                                                                                         | 65420  |
| 47 | (HIV adj3 screening).ab,kw,ti.                                                                                                                              | 5133   |
| 48 | Human immunodeficiency virus/ and Screening/<br>31 or 32 or 33 or 34 or 35 or 36 or 37 or 38 or 39 or 40 or 41 or 42 or 43 or 44 or 45<br>or 46 or 47 or 48 | 5274   |
| 49 |                                                                                                                                                             | 388294 |
| 50 | 30 and 49                                                                                                                                                   | 910    |

Ovid MEDLINE(R) Epub Ahead of Print, In-Process & Other Non-Indexed Citations, Ovid MEDLINE(R) Daily, Ovid MEDLINE and Versions(R) <1946 to May 16, 2018>

| #  | Searches                                                                                                                                                             | Results |
|----|----------------------------------------------------------------------------------------------------------------------------------------------------------------------|---------|
| 1  | exp homeless person/                                                                                                                                                 | 7887    |
| 2  | homelessness/                                                                                                                                                        | 6796    |
| 3  | homeless*.ab,kf,ti.                                                                                                                                                  | 9038    |
| 4  | (rough adj3 sleep*).ab,kf,ti.                                                                                                                                        | 46      |
| 5  | (street adj1 (person or people or youth)).ab,kf,ti.                                                                                                                  | 275     |
| 6  | halfway house/                                                                                                                                                       | 1049    |
| 7  | hostel*.ab,kf,ti.                                                                                                                                                    | 773     |
| 8  | night shelter*.ab,kf,ti.                                                                                                                                             | 36      |
| 9  | winter shelter*.ab,kf,ti.                                                                                                                                            | 3       |
| 10 | (seek* adj1 shelter).ab,kf,ti.                                                                                                                                       | 108     |
| 11 | emergency accommodation.ab,kf,ti.                                                                                                                                    | 10      |
| 12 | temporary accommodation.ab,kf,ti.                                                                                                                                    | 40      |
| 13 | supported accommodation.ab,kf,ti.                                                                                                                                    | 88      |
| 14 | supported housing.ab,kf,ti.                                                                                                                                          | 273     |
| 15 | (vulnerabl* adj1 hous*).ab,kf,ti.                                                                                                                                    | 129     |
| 16 | (precarious* adj1 hous*).ab,kf,ti.                                                                                                                                   | 54      |
| 17 | underhous*.ab,kf,ti.                                                                                                                                                 | 7       |
| 18 | unstable housing.ab,kf,ti.                                                                                                                                           | 234     |
| 19 | roofless.ab,kf,ti.                                                                                                                                                   | 13      |
| 20 | no fixed abode.ab,kf,ti.                                                                                                                                             | 43      |
| 21 | no fixed address.ab,kf,ti.                                                                                                                                           | 21      |
| 22 | (risk adj3 evict*).ab,kf,ti.                                                                                                                                         | 16      |
| 23 | supported lodging.ab,kf,ti.                                                                                                                                          | 1       |
| 24 | sofa surf*.ab,kf,ti.                                                                                                                                                 | 1       |
| 25 | (bed adj2 breakfast).ab,kf,ti.                                                                                                                                       | 24      |
| 26 | (liv* adj3 squat*).ab,kf,ti.                                                                                                                                         | 42      |
| 27 | squatter*.ab,kf,ti.                                                                                                                                                  | 354     |
| 28 | runaway*.ab,kf,ti.                                                                                                                                                   | 1460    |
| 29 | soup kitchen*.ab,kf,ti.                                                                                                                                              | 82      |
| 30 | 1 or 2 or 3 or 4 or 5 or 6 or 7 or 8 or 9 or 10 or 11 or 12 or 13 or 14 or 15 or 16 or 17<br>or 18 or 19 or 20 or 21 or 22 or 23 or 24 or 25 or 26 or 27 or 28 or 29 | 15190   |

|    |                                                                                                                   |        |
|----|-------------------------------------------------------------------------------------------------------------------|--------|
| 31 | Sexual Health/                                                                                                    | 180    |
| 32 | Reproductive Health/                                                                                              | 2394   |
| 33 | Family Planning Services/                                                                                         | 23858  |
| 34 | Reproductive Health Services/                                                                                     | 1543   |
| 35 | exp Contraception/                                                                                                | 25176  |
| 36 | Condoms/                                                                                                          | 9485   |
| 37 | exp Sexually Transmitted Diseases/                                                                                | 318741 |
| 38 | "sexual health*".ab,kf,ti.                                                                                        | 8175   |
| 39 | "reproductive health*".ab,kf,ti.                                                                                  | 12324  |
| 40 | (contraception or contraceptive).ab,kf,ti.                                                                        | 57209  |
| 41 | family planning.ab,kf,ti.                                                                                         | 39456  |
| 42 | "condom*".ab,kf,ti.                                                                                               | 19630  |
| 43 | safe sex.ab,kf,ti.                                                                                                | 1271   |
| 44 | "sexually transmitted disease*".ab,kf,ti.                                                                         | 16334  |
| 45 | "sexually transmitted infection*".ab,kf,ti.                                                                       | 11701  |
| 46 | "unintended pregnanc*".ab,kf,ti.                                                                                  | 3081   |
| 47 | "abortion*".ab,kf,ti.                                                                                             | 58184  |
| 48 | (HIV adj3 screening).ab,kf,ti.                                                                                    | 3756   |
| 49 | HIV/ and mass screening/                                                                                          | 226    |
| 50 | 31 or 32 or 33 or 34 or 35 or 36 or 37 or 38 or 39 or 40 or 41 or 42 or 43 or 44 or 45<br>or 46 or 47 or 48 or 49 | 465920 |
| 51 | 30 and 50                                                                                                         | 1782   |

Interface - EBSCOhost Research Databases      Search Screen - Advanced Search      Database -  
CINAHL Plus with Full Text;SocINDEX

| #   | Query                                                                                                                                                                               | Results |
|-----|-------------------------------------------------------------------------------------------------------------------------------------------------------------------------------------|---------|
| S1  | (SU "Sexual Health")                                                                                                                                                                | 5,937   |
| S2  | (SU "Reproductive Health")                                                                                                                                                          | 5,980   |
| S3  | (SU "Family Planning")                                                                                                                                                              | 5,839   |
| S4  | (SU "Contraception")                                                                                                                                                                | 9,515   |
| S5  | (SU "Condoms")                                                                                                                                                                      | 8,137   |
| S6  | (SU "Sexually Transmitted Diseases, Bacterial+")                                                                                                                                    | 16,446  |
| S7  | TI "sexual health" OR AB "sexual health"                                                                                                                                            | 6,805   |
| S8  | TI "sexual healthcare" OR AB "sexual healthcare"                                                                                                                                    | 69      |
| S9  | TI "reproductive health" OR AB "reproductive health"                                                                                                                                | 6,428   |
| S10 | TI "reproductive healthcare" OR AB "reproductive healthcare"                                                                                                                        | 196     |
| S11 | TI (contraception or contraceptive*) OR AB (contraception or contraceptive*)                                                                                                        | 19,874  |
| S12 | TI "family planning" OR AB "family planning"                                                                                                                                        | 7,980   |
| S13 | TI condom* OR AB condom*                                                                                                                                                            | 11,867  |
| S14 | TI "safe sex" OR AB "safe sex"                                                                                                                                                      | 973     |
| S15 | TI ("sexually transmitted" N1 (disease* or infection*)) OR AB ("sexually transmitted" N1 (disease* or infection*))                                                                  | 11,821  |
| S16 | TI (unintended N1 pregnanc*) OR AB (unintended N1 pregnanc*)                                                                                                                        | 2,263   |
| S17 | TI abortion* OR AB abortion*                                                                                                                                                        | 16,456  |
| S18 | TI HIV N3 screening OR AB HIV N3 screening                                                                                                                                          | 1,462   |
| S19 | (SU "Human Immunodeficiency Virus")                                                                                                                                                 | 3,897   |
| S20 | (SU "Health Screening")                                                                                                                                                             | 35,220  |
| S21 | S19 AND S20                                                                                                                                                                         | 124     |
| S22 | (S19 AND S20) OR (S1 OR S2 OR S3 OR S4 OR S5 OR S6 OR S7 OR S8 OR S9 OR S10 OR S11 OR S12 OR S13 OR S14 OR S15 OR S16 OR S17 OR S18)                                                | 77,776  |
| S23 | ((SU "Homeless Persons") OR (SU "Homelessness") OR (SU "HOMELESS shelters")) OR TI homeless* OR TI rough N3 sleep* OR TI ( street N1 (person* or people or youth*) ) OR TI "halfway |         |

house" OR TI hostel\* OR TI ( (night OR winter) N3 shelter\* ) OR TI "emergency accommodation" OR TI "supported accommodation" OR TI "temporary accommodation" OR TI "supported housing" OR TI "supported lodging" OR TI vulnerabl\* N1 hous\* OR TI precarious\* N1 hous\* OR TI underhous\* OR TI "unstable housing" OR TI roofless OR TI "no fixed abode" OR TI "no fixed address" OR TI risk N3 evict\* OR TI sofa N3 surf\* OR TI bed N3 breakfast OR TI ( (live OR living) N3 squat\* ) OR TI squatter\* OR TI runaway\* OR TI "soup kitchen" OR AB homeless\* OR AB rough N3 sleep\* OR AB ( street N1 (person\* or people or youth\* ) ) OR AB "halfway house" OR AB hostel\* OR AB ( (night OR winter) N3 shelter\* ) OR AB "emergency accommodation" OR AB "supported accommodation" OR AB "temporary accommodation" OR AB "supported housing" OR AB "supported lodging" OR AB vulnerabl\* N1 hous\* OR AB precarious\* N1 hous\* OR AB underhous\* OR AB "unstable housing" OR AB roofless OR AB "no fixed abode" OR AB "no fixed address" OR AB risk N3 evict\* OR AB sofa N3 surf\* OR AB bed N3 breakfast OR AB ( (live OR living) N3 squat\* ) OR AB squatter\* OR AB runaway\* OR AB "soup kitchen" 14,223  
S24 S22 AND S23 300 (233 Cinahl 67 SocINDEX)
