# Supplementary material
Source: HighWire-hosted journal article supplement (https://srh.bmj.com/content/bmjsrh-2020-200799)
Supplement: inline-supplementary-material-4 [file inline-supplementary-material-4.pdf]

## Supplementary File 4. Critical appraisal results

| CASP elements                                                                        | Aparicio et al., 2018 | Aparicio et al., 2019 | Begun et al., 2019a | Côté, 2019 | Dang et al., 2019 | Dasari et al., 2016 | Draucker et al., 2015 | Ensign & Panke, 2001 | Gelbert et al., 2004 | Hartwell et al., 1994 | Hathazi et al., 2009 | Henning et al., 2007 |
|--------------------------------------------------------------------------------------|-----------------------|-----------------------|---------------------|------------|-------------------|---------------------|-----------------------|----------------------|----------------------|-----------------------|----------------------|----------------------|
| Was there a clear statement of the aims of the research?                             | Y                     | Y                     | Y                   | Y          | Y                 | Y                   | Y                     | Y                    | Y                    | Y                     | Y                    | Y                    |
| Is a qualitative methodology appropriate?                                            | Y                     | Y                     | Y                   | Y          | Y                 | Y                   | Y                     | Y                    | Y                    | Y                     | Y                    | Y                    |
| Was the research design appropriate to address the aims of the research?             | Y                     | Y                     | Y                   | Y          | Y                 | Y                   | Y                     | Y                    | Y                    | Y                     | Y                    | Y                    |
| Was the recruitment strategy appropriate to the aims of the research?                | Y                     | Y                     | Y                   | Y          | Y                 | Y                   | Y                     | Y                    | Y                    | U                     | Y                    | Y                    |
| Were the data collected in a way that addressed the research issue?                  | Y                     | Y                     | Y                   | Y          | Y                 | Y                   | Y                     | Y                    | Y                    | U                     | Y                    | Y                    |
| Has the relationship between researcher and participants been adequately considered? | Y                     | U                     | U                   | Y          | Y                 | U                   | U                     | U                    | U                    | Y                     | N                    | U                    |
| Have ethical issues been taken into consideration?                                   | Y                     | Y                     | Y                   | Y          | Y                 | U                   | Y                     | Y                    | U                    | U                     | Y                    | Y                    |
| Was the data analysis sufficiently rigorous?                                         | Y                     | Y                     | Y                   | Y          | Y                 | Y                   | Y                     | U                    | Y                    | U                     | Y                    | U                    |
| Is there a clear statement of findings?                                              | Y                     | Y                     | Y                   | Y          | Y                 | Y                   | Y                     | Y                    | Y                    | Y                     | Y                    | Y                    |

## Supplementary File 4. Critical appraisal results

| CASP elements                                                                        | Holger-Ambrose et al.,2016 | Kachingwe et al., 2019 | Kennedy et al.,2014 | Killion, 1998 | Leidel et al., 2017 | McGregor et al., 2018 | Oliver & Cheff, 2012 | Rew et al., 2002 | Rew et al., 2008 | Shah et al., 2019 | Stringer et al.,2012 |
|--------------------------------------------------------------------------------------|----------------------------|------------------------|---------------------|---------------|---------------------|-----------------------|----------------------|------------------|------------------|-------------------|----------------------|
| Was there a clear statement of the aims of the research?                             | Y                          | Y                      | Y                   | Y             | Y                   | Y                     | Y                    | Y                | Y                | Y                 | Y                    |
| Is a qualitative methodology appropriate?                                            | Y                          | Y                      | Y                   | Y             | Y                   | Y                     | Y                    | Y                | Y                | Y                 | Y                    |
| Was the research design appropriate to address the aims of the research?             | Y                          | Y                      | Y                   | Y             | Y                   | Y                     | Y                    | Y                | Y                | Y                 | Y                    |
| Was the recruitment strategy appropriate to the aims of the research?                | Y                          | Y                      | N                   | Y             | Y                   | U                     | Y                    | Y                | Y                | Y                 | U                    |
| Were the data collected in a way that addressed the research issue?                  | Y                          | Y                      | Y                   | Y             | Y                   | Y                     | Y                    | Y                | U                | Y                 | Y                    |
| Has the relationship between researcher and participants been adequately considered? | Y                          | U                      | U                   | U             | U                   | U                     | U                    | U                | U                | U                 | U                    |
| Have ethical issues been taken into consideration?                                   | Y                          | Y                      | Y                   | U             | Y                   | Y                     | U                    | Y                | Y                | Y                 | U                    |
| Was the data analysis sufficiently rigorous?                                         | Y                          | Y                      | Y                   | U             | Y                   | U                     | U                    | Y                | Y                | Y                 | Y                    |
| Is there a clear statement of findings?                                              | Y                          | Y                      | Y                   | Y             | Y                   | Y                     | Y                    | Y                | Y                | Y                 | Y                    |
